# Supplementary material for: Anharmonic excited state frequencies of para-difluorobenzene, toluene and catechol using analytic RI-CC2 second derivatives
Source: Royal Society of Chemistry journal article supplement (doi:10.1039/c8cp06952b), 2019-01-01
Supplement: c8cp06952b1.pdf [file c8cp06952b1.pdf]

# Supplement to: Anharmonic excited state frequencies of para-difluorobenze, toluene and catechol using analytic RI-CC2 second derivatives

David P. Tew,<sup>\*a</sup> Christof Hättig,<sup>b</sup> and Nora K. Graf<sup>b</sup>

<sup>a</sup> *Max Planck Institute for Solid State Research, 70569 Stuttgart, Germany. E-mail: d.tew@fkf.mpg.de*

<sup>b</sup> *Quantum Chemistry Group, Ruhr-Universität Bochum, 44780 Bochum, Germany*

# 1 Detailed formulas for the implementation

Table 1: Definitions of the different RI three-index integrals  $B_{Q,pq}$ . The three-index integral in the AO-basis is denoted with  $(\alpha\beta|P)$ , whereas  $[\mathbf{V}^{-1/2}]_{PQ}$  denotes a two-index integral. The MO coefficient matrix is denoted with  $\mathbf{C}$ , the definitions of the  $\mathbf{\Lambda}$  and  $\lambda$  matrices are given in table 2. The macron on the  $\bar{B}_{Q,pq}$  intermediates denotes a dependency on a right vector ( $R^f$ ,  $R^{f,x}$ , or  $t^x$ ), whereas the breve denotes a dependency on a left vector ( $L^f$  or  $\bar{t}^f$ ). Note that the intermediate  $\bar{\bar{B}}_{Q,pq}^{xy}$  depends on two different right eigenvectors  $R^x$  and  $R^y$ .

---



---


$$\begin{aligned}
B_{Q,pq} &= \sum_{\alpha\beta P} C_{\alpha p} C_{\beta p} (\alpha\beta|P) [\mathbf{V}^{-1/2}]_{PQ} \\
\hat{B}_{Q,pq} &= \sum_{\alpha\beta P} \Lambda_{\alpha p}^p \Lambda_{\beta p}^h (\alpha\beta|P) [\mathbf{V}^{-1/2}]_{PQ} \\
\bar{B}_{Q,pq}[R] &= \sum_{\alpha\beta P} (\bar{\Lambda}_{\alpha p}^p \Lambda_{\beta p}^h + \Lambda_{\alpha p}^p \bar{\Lambda}_{\beta p}^h) (\alpha\beta|P) [\mathbf{V}^{-1/2}]_{PQ} \\
\bar{\bar{B}}_{Q,pq}[R^x, R^y] &= \sum_{\alpha\beta P} (\bar{\Lambda}_{\alpha p}^{px} \bar{\Lambda}_{\beta p}^{hy} + \bar{\Lambda}_{\alpha p}^{py} \bar{\Lambda}_{\beta p}^{hx}) (\alpha\beta|P) [\mathbf{V}^{-1/2}]_{PQ} \\
\breve{B}_{Q,pq} &= \sum_{\alpha\beta P} (\breve{\Lambda}_{\alpha p}^p \Lambda_{\beta p}^h + \Lambda_{\alpha p}^p \breve{\Lambda}_{\beta p}^h) (\alpha\beta|P) [\mathbf{V}^{-1/2}]_{PQ} \\
\breve{\breve{B}}_{Q,ia} &= - \sum_{kc} L_{ci} R_{ck} B_{Q,ka} - \sum_{ck} L_{ak} R_{ck} B_{Q,ic} \\
B_{Q,pq}^x &= \sum_{\alpha\beta P} (C_{\alpha p}^x C_{\beta p} + C_{\alpha p} C_{\beta p}^x) (\alpha\beta|P) [\mathbf{V}^{-1/2}]_{PQ} \\
&\quad + \sum_{\alpha\beta P} C_{\alpha p} C_{\beta p} \left( (\alpha\beta|P)^{[x]} - \frac{1}{2} \sum_{RQ} (\alpha\beta|R) [\mathbf{V}^{-1}]_{RS} V_{SP}^{[x]} \right) [\mathbf{V}^{-1/2}]_{PQ} \\
\hat{B}_{Q,pq}^x &= \sum_{\alpha\beta P} (\Lambda_{\alpha p}^{p,x} \Lambda_{\beta p}^h + \Lambda_{\alpha p}^p \Lambda_{\beta p}^{h,x}) (\alpha\beta|P) [\mathbf{V}^{-1/2}]_{PQ} \\
&\quad + \sum_{\alpha\beta P} \Lambda_{\alpha p}^p \Lambda_{\beta p}^h \left( (\alpha\beta|P)^{[x]} - \frac{1}{2} \sum_{RS} (\alpha\beta|R) [\mathbf{V}^{-1}]_{RS} V_{SP}^{[x]} \right) [\mathbf{V}^{-1/2}]_{PQ} \\
\bar{B}_{Q,ai}^x[R] &= \sum_b \hat{B}_{Q,ab}^x R_{bi} - \sum_j R_{aj} \hat{B}_{Q,ji}^x \\
\bar{\bar{B}}_{Q,ai}^{f,x} &= \bar{\bar{B}}_{Q,ai}[R^f, t^x] + \bar{B}_{Q,ai}^x[R^f] + \bar{B}_{Q,ai}[R^{f,x}]
\end{aligned}$$


---



---

Table 2: Definitions of the transformation matrices.

|                                                                           |                                                                           |
|---------------------------------------------------------------------------|---------------------------------------------------------------------------|
| $\lambda_{rp}^p = \delta_{rp} - \sum_{ai} \delta_{ri} \delta_{pa} t_{ai}$ | $\lambda_{rp}^h = \delta_{rp} + \sum_{ai} \delta_{ra} \delta_{pi} t_{ai}$ |
| $\Lambda_{\alpha p}^p = \sum_r C_{\alpha r} \lambda_{rp}^p$               | $\Lambda_{\alpha p}^h = \sum_r C_{\alpha r} \lambda_{rp}^h$               |
| $\bar{\Lambda}_{\alpha a}^p = -\sum_i C_{\alpha i} R_{ia}$                | $\bar{\Lambda}_{\alpha i}^h = \sum_a C_{\alpha a} R_{ai}$                 |
| $\check{\Lambda}_{\alpha i}^p = \sum_a \Lambda_{\alpha a}^p L_{ai}$       | $\check{\Lambda}_{\alpha a}^h = -\sum_i \Lambda_{\alpha i}^h L_{ia}$      |
| $\Lambda_{\alpha p}^{p,x} = \sum_r C_{\alpha r}^x \lambda_{rp}^p$         | $\Lambda_{\alpha p}^{h,x} = \sum_r C_{\alpha r}^x \lambda_{rp}^h$         |

For the two-particle terms from the derivatives of the non-separable two-particle density with the derivatives of the MO two-electron integrals:

$$\sum_{pqrs} \hat{d}_{pqrs}^{nsep,ex,y} (pq|rs)^x = \sum_{\alpha\beta Q} \Delta_{\alpha\beta}^{Q,y} (\alpha\beta|Q)^{[x]} - \sum_{PQ} \gamma_{PQ}^y V_{PQ}^{[x]} + \sum_{pq} F_{pq}^{eff,y} U_{pq}^x \quad (1)$$

the three- and two-index two-particle densities for the contraction with the first derivatives of the three- and two-index AO integrals are defined as:

$$\Delta_{pq}^{Q,y} = \sum_{rsP} \hat{d}_{pqrs}^{nsep,ex,y} \hat{B}_{P,rs} [V^{-1/2}]_{PQ} \quad (2)$$

$$\Delta_{\alpha\beta}^{Q,y} = \sum_{pq} \Lambda_{\alpha p}^p \Lambda_{\beta q}^h \Delta_{pq}^{Q,y} \quad (3)$$

$$\gamma_{PQ}^y = \frac{1}{2} \sum_{pqR} \Delta_{pq}^{Q,y} \hat{B}_{R,pq} [V^{-1/2}]_{RP} \quad (4)$$

The effective Fock matrices needed to account for the contribution of the derivatives of the MO coefficients are:

$$F_{pq}^{eff,y} = \sum_{rst} (d_{rstp}^{nsep,ex,y} + d^{nsep,ex}) (rs|tq)^{RI} \quad (5)$$

$$d_{rspq}^{nsep,ex,y} = \sum_{r's'p'q'} \hat{d}_{r's'p'q'}^{nsep,ex,y} \lambda_{rr'}^p \lambda_{ss'}^h \lambda_{pp'}^p \lambda_{qq'}^h \quad (6)$$

For the contribution of the second derivatives of the AO integrals  $\langle H^{[xy]} \rangle$  the three and two-particle densities are given by:

$$\Delta_{pq}^Q = \sum_{rsP} \hat{d}_{pqrs}^{nsep,ex} \hat{B}_{P,rs}[V^{-1/2}]_{PQ} \quad (7)$$

$$\Delta_{\alpha\beta}^Q = \sum_{pq} \Lambda_{\alpha p}^p \Lambda_{\beta q}^h \Delta_{pq}^Q \quad (8)$$

$$\gamma_{PQ} = \frac{1}{2} \sum_{pqR} \Delta_{pq}^Q \hat{B}_{R,pq}[V^{-1/2}]_{RP} \quad (9)$$

$$\Delta_{pq}^{Q,[x]} = \sum_{rsP} \hat{d}_{pqrs}^{nsep,ex} \sum_{\alpha\beta} \Lambda_{\alpha r}^p \Lambda_{\beta s}^h \left( (\alpha\beta|P)^{[x]} - \sum_{SR} (\alpha\beta|S) V_{SR}^{-1/2} V_{RP}^{[x]} \right) V_{PQ}^{-1} \quad (10)$$

$$\Delta_{\alpha\beta}^{Q,[x]} = \sum_{pq} \Lambda_{\alpha p}^p \Lambda_{\beta q}^h \Delta_{pq}^Q \quad (11)$$

$$\gamma_{PQ}^{[x]} = \sum_{pqR} \Delta_{pq}^{Q,[x]} \hat{B}_{R,pq}[V^{-1/2}]_{RP} \quad (12)$$
